# Supplementary material
Source: Springer Nature journal article supplement (https://www.springermedizin.de/resource/supplementary/12872_2014_724_MOESM1_ESM.pdf/9430750)

# Death at 12 month

Explanatory variable female gender :

OR

95% CI

P-value

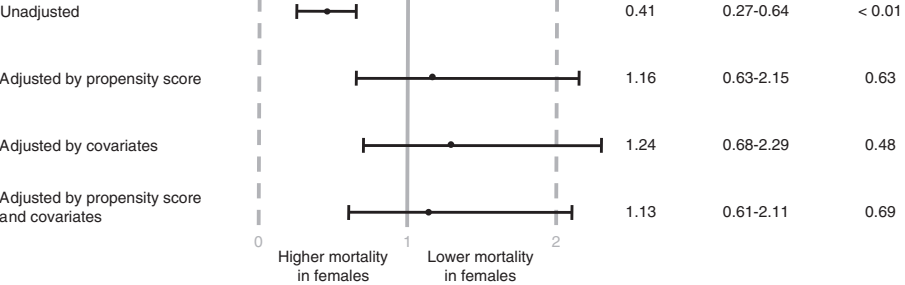

Supplement: MOESM1 [file 9430750]
